# Supplementary material for: Diversity of SIRV-like Viruses from a North American Population
Source: MDPI journal article supplement (doi:10.3390/v14071439), 2022-06-30

# Supplementary Material for Fackler *et al.*, 2022 (Tables S1–S4, Figures S1–S7)

**Table S1. PCR primers**

| <u>Region Analyzed</u>                                               | <u>Primer Name</u> | <u>Primer Sequence</u>        |
|----------------------------------------------------------------------|--------------------|-------------------------------|
| M16.4 (K00 16-4) CRISPR 1 leader region                              | 16.4 C1 MidFor 1   | AAAAATTACACGGTATCTGGGATC      |
|                                                                      | 16.4 C1 MidFor 2   | CTCATTTCTAGGGTTGAAATAAGGTAC   |
|                                                                      | 16.4 C1 Rev        | TAAGGAGTGGGGTAAAGACATTC       |
|                                                                      |                    |                               |
| M16.4 (K00 16-4) CRISPR 2 leader region                              | 16.4 C2 For        | CATTAAATCCCATGGTCACAAAATATG   |
|                                                                      | 16.4 C2 MidRev 1   | ATAATCTAAAGGGAGAAGAAAGAATCAAG |
|                                                                      | 16.4 C2 MidRev 2   | ATCCATTATTTCTCAGAATATCAGAAAAG |
|                                                                      |                    |                               |
| M16.4 (K00 16-4) Homologues of <i>S. solfataricus</i> P2 pilus genes | M164_0199 FWD1     | CTCACATGTTCTAGAAGATAAAGA      |
|                                                                      | M164_0199 REV1     | GACCTATTGTAAATGCTAATACG       |
|                                                                      | M164_0199 FWD2     | GCATACAAGATATTTTACGTTAC       |
|                                                                      | M164_0199 REV2     | CTGGTGGTTCTAATAAAACAT         |
|                                                                      | M164_0200 FWD1     | GCAGACTATGAAGTGAATATACTAA     |
|                                                                      | M164_0200 REV1     | TTCATCATAGGTATCCACTCTT        |
|                                                                      | M164_0200 FWD2     | ATAGTAGTAGGCGAGATAAGA         |
|                                                                      | M164_0200 REV2     | GTTTAAATGGAAGGTAAGTCC         |
|                                                                      | M164_2227 FWD1     | AACAGTAACGATTATTATCAACAAA     |
|                                                                      | M164_2227 REV1     | TGCACCTAAAACAACCTTGAA         |
|                                                                      | M164_2228 FWD1     | CTTCTCAAGCTAATTTCTATTTTC      |
|                                                                      | M164_2228 REV1     | ACATTATACCGTAATTCCTC          |
|                                                                      | M164_2228 FWD2     | GTGGTAACTTCGAAATTGTT          |
|                                                                      | M164_2228 REV2     | TTGGGACTGTTGTGTAGTAT          |
|                                                                      | M164_2228 FWD3     | ATGGGCAATAGCAATATCAATA        |
|                                                                      | M164_2228 REV3     | GGAATAGTCAAGATAAGGTCAT        |
|                                                                      |                    |                               |
|                                                                      |                    |                               |
|                                                                      |                    |                               |
|                                                                      |                    |                               |
|                                                                      |                    |                               |
|                                                                      |                    |                               |
| M16.4 (K00 16-4) putative pilin genes                                | 16-4 PilA1 fwd     | AATAAGTTGAGGTGCCATT           |
|                                                                      | 16-4 PilA1 rev     | ATTTGTTGGATGAGGGTAG           |
|                                                                      | 16-4 PilA2 fwd     | ATTCTGACTTATCGGGAAT           |
|                                                                      | 16-4 PilA2 rev     | CTCACTAGCGTATTGTTGC           |

**Table S2. Genes conserved among Icelandic and North American isolates<sup>a</sup>**

| SIRV1 |      | SIRV2 |      | V3          |      | V60         |      | V65         |      | dN/dS | Functional Feature <sup>b</sup> |
|-------|------|-------|------|-------------|------|-------------|------|-------------|------|-------|---------------------------------|
| ORF   | AA   | ORF   | AA   | Location    | AA   | Location    | AA   | Location    | AA   |       |                                 |
| gp19  | 134  | gp26  | 134  | 9903-10307  | 134  | 8495-8899   | 134  | 8199-8603   | 134  | 0.083 | major capsid protein            |
| gp21  | 335  | gp28  | 335  | 10554-11561 | 335  | 9146-10153  | 335  | 8850-9857   | 335  | 0.209 | group 1 glycosyl transferase    |
| gp36  | 356  | gp44  | 356  | 26564-27628 | 354  | 26116-27180 | 354  | 24818-25804 | 328  | 0.360 | group 1 glycosyl transferase    |
| gp27  | 121  | gp35  | 121  | 16641-17006 | 121  | 15233-15622 | 129  | 14937-15302 | 121  | 0.401 | Holliday junction resolvase     |
| gp06  | 306  | gp13  | 310  | 29256-30191 | 311  | 28808-29743 | 311  | 27024-27959 | 311  | 0.421 | tRNA ribosyl transferase        |
| gp10  | 131  | gp17  | 131  | 7096-7497   | 133  | 5484-5885   | 133  | 5404-5805   | 133  | 0.501 | ssDNA-binding protein           |
| gp42  | 98   | gp49  | 98   | 8280-8567   | 95   | 6676-6963   | 95   | 6596-6895   | 99   | 0.681 | virion release structure        |
| gp07  | 399  | gp14  | 399  | 28063-29253 | 396  | 27615-28805 | 396  | 25831-27021 | 396  | 0.520 | amino-acid transporter          |
| gp31  | 562  | gp39  | 562  | 20762-22462 | 566  | 20434-22134 | 566  | 19058-20758 | 566  | 0.852 | structural protein              |
| gp25  | 510  | gp33  | 462  | 14299-15699 | 466  | 12891-14291 | 466  | 12595-13995 | 466  | 0.877 | structural protein              |
| gp11  | 440  | gp18  | 436  | 5763-7070   | 435  | 4151-5458   | 435  | 4071-5378   | 435  | 0.918 | ssDNA annealing                 |
| gp35  | 209  | gp43  | 176  | 25843-26448 | 201  | 25395-26000 | 201  | 24019-24624 | 201  | 1.07  | glycosyl transferase            |
| gp33  | 158  | gp41  | 158  | 24123-24605 | 160  | 23675-24157 | 160  | 22299-22781 | 160  | 1.11  | methyl transferase              |
| gp30  | 1070 | gp38  | 1070 | 17497-20673 | 1058 | 16329-19505 | 1058 | 15793-18969 | 1058 | 1.22  | minor capsid protein            |
| gp12  | 207  | gp19  | 207  | 5142-5760   | 205  | 3531-4148   | 205  | 3451-4068   | 205  | 1.49  | ssDNA nuclease                  |
| gp09  | 125  | gp16  | 119  | 7909-8286   | 125  | 6297-6674   | 125  | 6217-6594   | 125  | 1.79  | replication initiator protein   |

<sup>a</sup> Homologous open reading frames shared by the five viruses are listed in order of increasing dN/dS ratio. The following ORFs of SIRV1 and -2 were not found in the genomes of YNP isolates: SIRV1 gp05, gp12, gp15, gp29 and gp44, corresponding to SIRV2 gp12, gp20, gp22, gp37, and gp52, respectively.

<sup>b</sup> Based on analyses of Bautista MA, Black JA, Youngblut ND and Whitaker RJ (2017) Viruses 9:10.3390/v9050120; Oke M, Kerou M, Liu H, Peng X, Garrett RA, Prangishvili D, Naismith JH, White MF. 2011. J. Virol. 85:925-931. doi: 10.1128/JVI.01467-10; Guo, Y, Kragelund BB, White MF, Peng X. 2015. J. Mol. Biol. 427:2179-2191. doi: 10.1016/j.jmb.2015.03.013 [doi]; Prangishvili, D, Koonin EV, Krupovic M. 2013. Biochem. Soc. Trans. 41:443-450. doi: 10.1042/BST20120313 [doi].

**Table S3. Statistical comparison of virion thermostability<sup>a</sup>**

|                      | <b>V3</b> | <b>V60</b> | <b>V65</b> |
|----------------------|-----------|------------|------------|
|                      | -1.146    | -2.359     | -2.642     |
|                      | -1.126    | -2.271     | -1.690     |
|                      | -1.101    | -2.084     | -1.664     |
|                      | -1.046    | -2.013     | -1.623     |
|                      | -1.000    | -1.889     | -1.615     |
|                      | -1.000    | -1.824     | -1.560     |
|                      | -0.884    | -1.820     | -1.523     |
|                      | -0.824    | -1.760     | -1.512     |
|                      | -0.821    | -1.745     | -1.386     |
|                      | -0.799    | -1.723     | -1.382     |
|                      | -0.747    | -1.699     | -1.262     |
|                      | -0.740    | -1.664     | -1.212     |
|                      | -0.708    | -1.601     | -1.117     |
|                      | -0.553    | -1.557     | -0.915     |
|                      | -0.420    | -1.529     | -0.873     |
|                      |           | -1.507     |            |
| <b>n<sup>b</sup></b> | 15        | 16         | 15         |
| <b>Mean</b>          | -0.861    | -1.815     | -1.465     |
| <b>Median</b>        | -0.824    | -1.752     | -1.512     |

<sup>a</sup>Values in each column are log(final titer/initial titer) for 7-h incubation in a boiling water bath, listed in ranked order.

<sup>b</sup>Independent replicate measurements of six lysates per virus; two-tailed T tests yield P values of  $3 \times 10^{-12}$ , 0.01, and  $6 \times 10^{-5}$  for V3 vs. V60, V60 vs. V65, and V65 vs. V3, respectively.

**Table S4. Stability properties of an expanded population sample.**

Survival values are log(surviving fraction) averaged over three assays. Treatments: 2 h in boiling water bath, other treatments were at 60° C (1 h in 5 M urea, 1h in 5 M guanidinium chloride, 30 min in chloroform-saturated buffer, 36 h in 18% ethanol); “SD” indicates standard deviation.

| Isolate | Boiling  |       |      | Urea     |       |      | Guanidinium |       |      | CHCl <sub>3</sub> |       |      | Ethanol  |       |      | Overall Rank |      |
|---------|----------|-------|------|----------|-------|------|-------------|-------|------|-------------------|-------|------|----------|-------|------|--------------|------|
|         | Survival | SD    | Rank | Survival | SD    | Rank | Survival    | SD    | Rank | Survival          | SD    | Rank | Survival | SD    | Rank | avg          | SD   |
| V36     | -0.060   | 0.013 | 1    | -0.593   | 0.016 | 5    | -1.259      | 0.102 | 3    | -1.540            | 0.088 | 6    | 0.011    | 0.030 | 1    | 3.2          | 2.04 |
| V55     | -0.101   | 0.031 | 2    | -0.534   | 0.266 | 4    | -0.383      | 0.089 | 2    | -0.912            | 0.301 | 2    | -0.022   | 0.002 | 2    | 2.4          | 0.8  |
| 40.32   | -0.218   | 0.217 | 3    | -0.064   | 0.063 | 1    | 0.017       | 0.100 | 1    | -1.228            | 0.058 | 4    | -0.033   | 0.050 | 3    | 2.4          | 1.2  |
| 27.5    | -0.865   | 0.931 | 4    | -0.282   | 0.103 | 3    | -1.262      | 0.068 | 4    | -1.283            | 0.091 | 5    | -1.287   | 0.098 | 5    | 4.2          | 0.75 |
| 27.16   | -1.879   | 0.235 | 5    | -0.174   | 0.128 | 2    | -1.369      | 0.091 | 6    | -0.413            | 0.345 | 1    | -0.039   | 0.020 | 4    | 3.6          | 1.85 |
| V45     | -1.901   | 0.603 | 6    | -4.460   | 0.337 | 6    | -1.361      | 0.104 | 5    | -0.932            | 0.556 | 3    | -2.534   | 0.549 | 6    | 5.2          | 1.17 |

**Figure S1. Test for renaturation of viral restriction fragments.**

Purified V3 or  $\lambda$  DNA (100 ng) was digested with endonuclease StyI 1h in NEB1 buffer at 37° C. Half of the resulting digest was heated to 100° C for 5 min and then chilled quickly to 0° C, and the resulting two samples were electrophoresed in 1% agarose in adjacent lanes. White arrowheads and numbers beside the gel photograph indicate length of individual restriction fragments. The 10.1 and 6.2 kbp StyI fragments of V3 DNA are the only StyI fragments that renature under these conditions, and correspond to the two ends of the linear V3 genome sequence. Lane A, V3 unheated; lane B, V3 heated and cooled; lane C,  $\lambda$  unheated; lane D,  $\lambda$  heated and cooled.

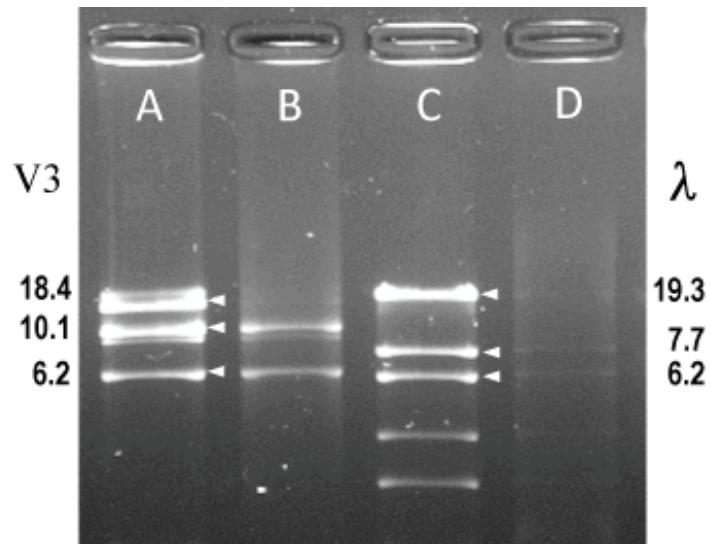

**Figure S2. Comparison of viral genomes**

Genome sequences of the North American (V3, V60, V65) and Icelandic (SIRV1, SIRV2) isolates were aligned by Progressive Mauve (see Methods). Blocks of corresponding sequences shared among the isolates are indicated.

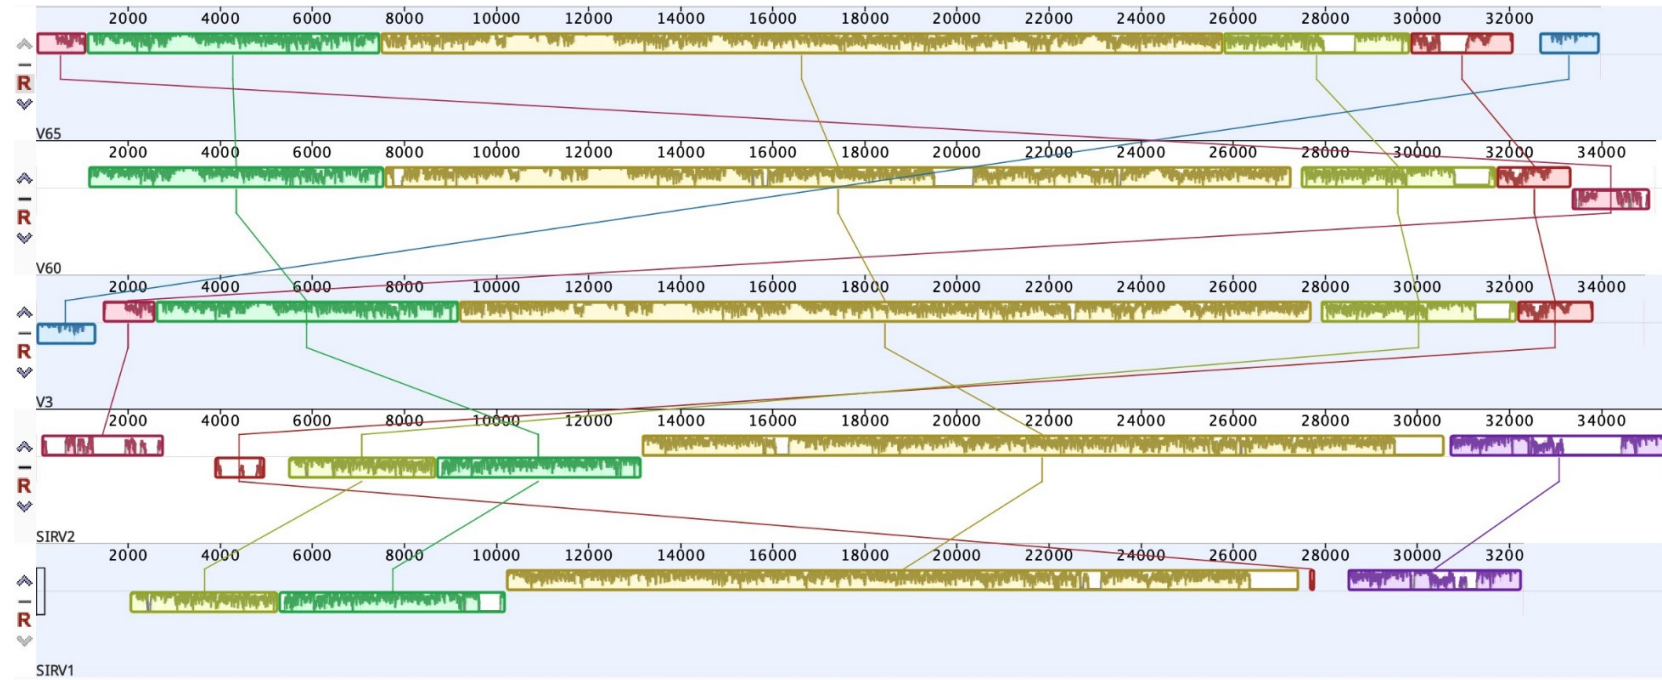

Sequence of the gene encoding the major capsid protein; the consensus sequence indicates 90% (uppercase) and 50% (lowercase) agreement. V3, V60, and V65 differ from each other at 35 nucleotide positions (marked by asterisks) but encode the same polypeptide (MAKGRTPRSYSQRYAKWNAKFVSFSNPTVASTILSNVAPVAQQNFQTNVPKFTSVNEQVSAVLSEYGITGPNRAIYQGFGLKVARALNRLGGGPALV NMINGLKAYYISAFNANPTVLDVAVTNIITGSPTGYVS).

[illegible]

**Figure S4. Scoring resistance by cross-streaking.**

The cross-streak plate was prepared by spreading a virus suspension as a vertical stripe about 2 cm wide in the center of a DT plate. Control and test strains were then smeared from one edge of the plate across the central virus zone. In the results shown, the top four streaks were selected as resistant host variants, and the bottom streak was wild-type K00 16-4, exhibiting the sensitive phenotype.

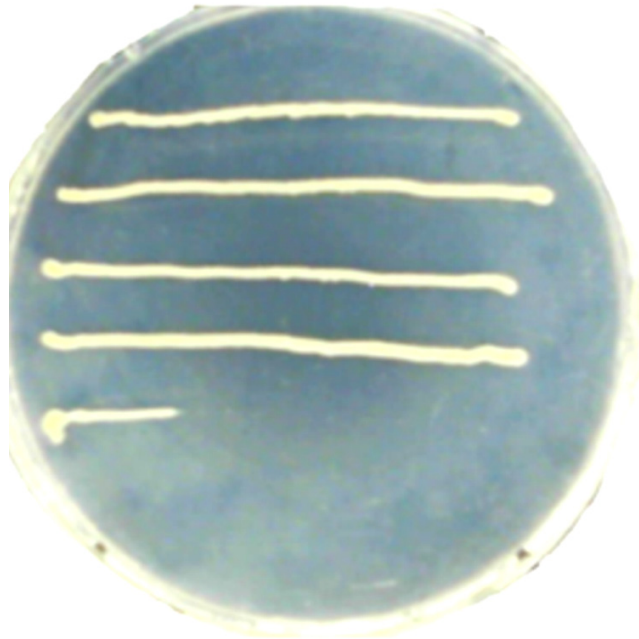



**Figure S5. Testing for enlargement of CRISPR loci.**

Leader regions of the two CRISPR loci of K00 16-4 were amplified from WT and from purified clones of host selected for virus resistance; primers are listed in Table S1. PCR products from virus-sensitive and virus-resistant cells were electrophoresed adjacent to each other and to reference DNAs allowed length increases of 20 bp or more to be detected. The equal lengths of product from sensitive (WT) and resistant host strains (V3R, V60R, V65R, etc.) confirm that no enlargement of either CRISPR locus accompanied the acquisition of viral resistance in the strains tested. Length references are provided by BstEII restriction fragments of  $\lambda$  (1.4, 1.3, and 0.7 kbp) and Tsp509I fragments of pUC19 (955 bp, 988 bp).

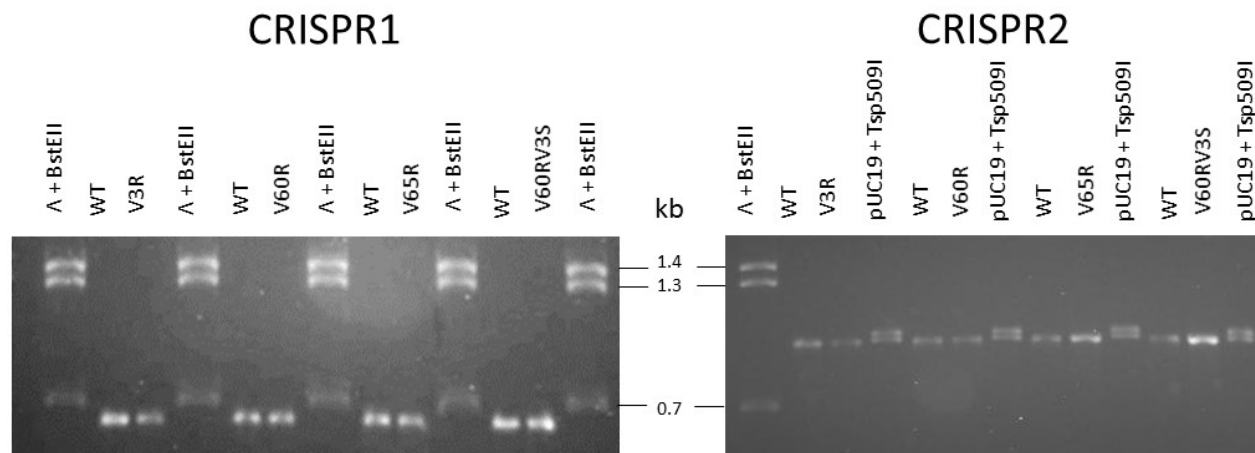

**Figure S6. Acquired sensitivity to virus infection.**

Scoring of individual colonies from a V3-resistant clone grown to form a population of  $10^8$  cells (see Materials and Methods). Panels show a set of 48 resuspended colonies spotted on virus-free medium (left) and on medium spread with V3 (right).

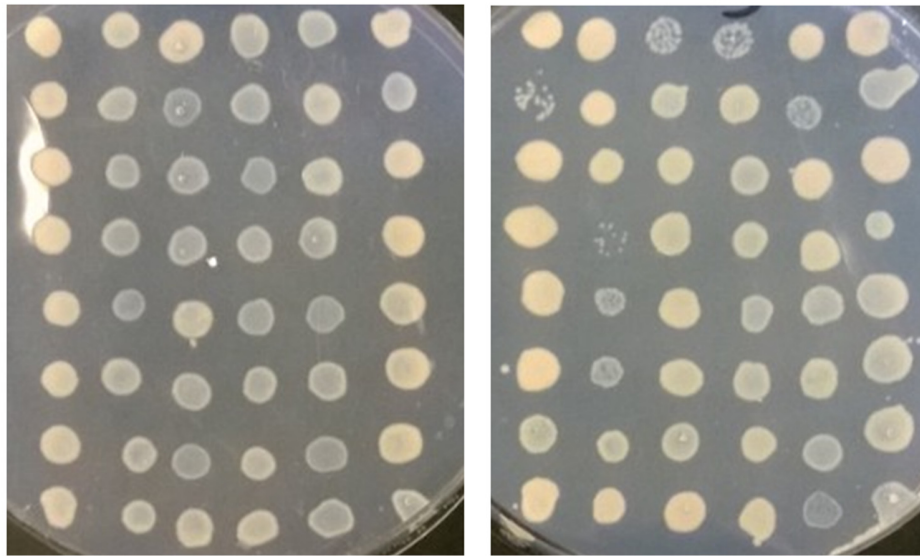

**Figure S7. Genetic organization of *S. islandicus* *pilA1*-*pilA2* region.**

Horizontal bars indicate the DNAs amplified by PCR primers used in this study (Table S1). In host strain K0016-4, the indicated A1 and A2 regions are 895 bp and 868 bp long, respectively, and they occur 2000 bp apart; thus the region depicted below spans M16\_4 genome co-ordinates 2551098 to 2554439. Location and orientation of each coding sequence is indicated by the large gray arrows. The open boxes below the DNAs depict the region repeated between the two *pilA* genes, and the vertical bars mark the approximate locations of 26 bp that differ between the two repeats.

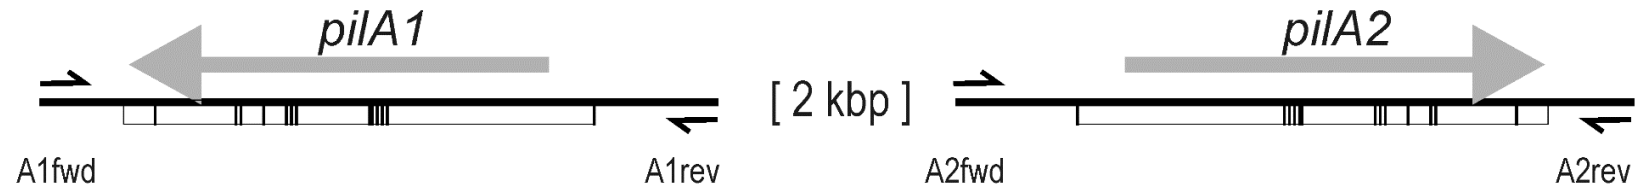

Supplement: s1 [file s1]
